# Supplementary material for: EGFL7 reduces CNS inflammation in mouse
Source: PubMed Central journal article supplement (PMC5827652; doi:10.1038/s41467-018-03186-z), 2018-02-26
Supplement: 41467_2018_3186_MOESM1_ESM.pdf [file 41467_2018_3186_MOESM1_ESM.pdf]

## **Supplementary Information**

**EGFL7 reduces CNS inflammation in mouse**

**Larochelle and Uphaus et al.**

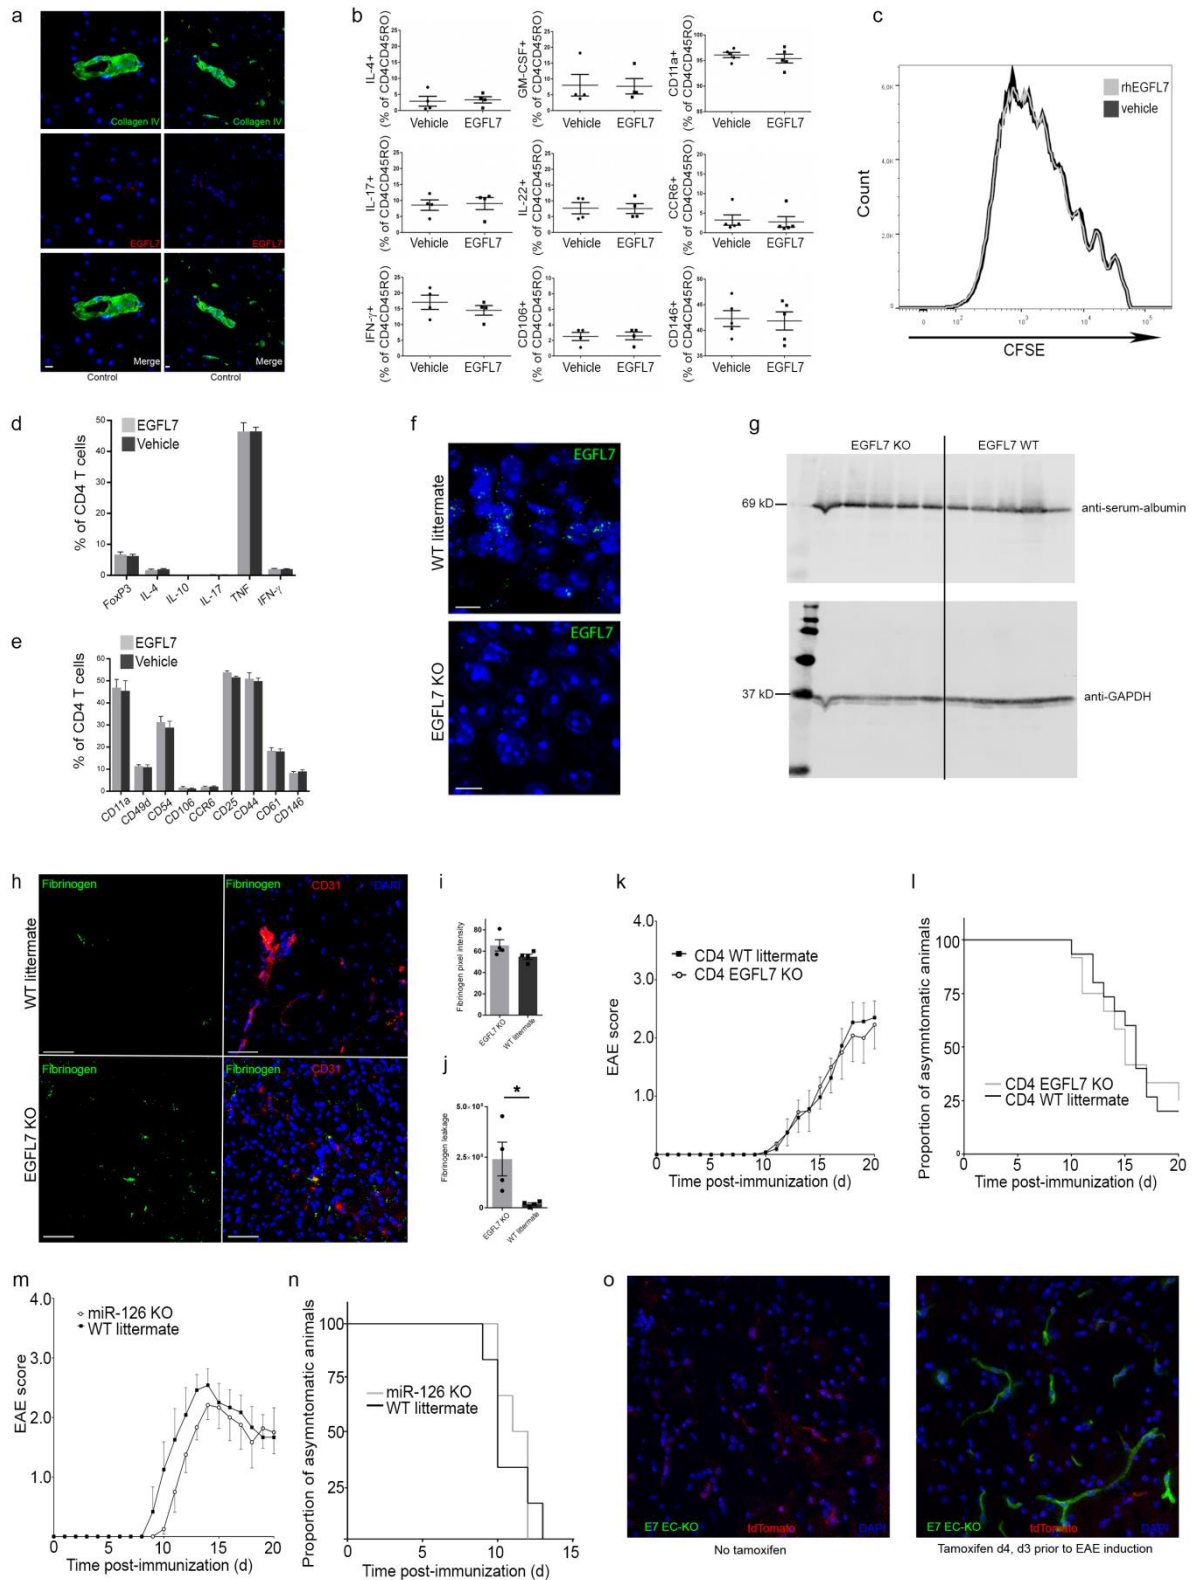

**Supplementary Figure 1: The beneficial role of EGFL7 in neuroinflammation is not dependent on expression by CD4 T lymphocytes or expression of miR-126/miR-126\***

a) Expression of EGFL7 (red) by CNS brain vessels (collagen IV, green) in human healthy controls (additional examples). Nuclei (DAPI) = blue. Scale bar = 10  $\mu$ m. b) Expression of cytokines and cell adhesion molecules by human memory CD4 T lymphocytes activated for 6 d over cell culture plates pre-coated with rhEGFL7 or vehicle, as measured by flow cytometry. 1 dot = 1 donor. No significant difference was observed following analysis by paired Student's t-test. (c) Flow cytometry histogram showing proliferation of human memory CD4 T lymphocytes described in (b). Representative of n = 4 donors. (d) Expression of cytokines, FoxP3, and (e) activation markers and cell adhesion molecules by activated murine CD4 T lymphocytes put on cell culture plates pre-coated with rmEGFL7 or vehicle for 24 h before analysis by flow cytometry. n = 6 mice. No significant difference was observed following analysis by paired Student's t-test. (f) Representative EGFL7 fluorescence in situ hybridization (FISH; green) in EGFL7 knockout (KO) mice and wild-type (WT) littermates. Nuclei (DAPI) = blue. Scale bar = 10  $\mu$ m. (g) Uncropped Western Blot images of figure 3h. (h-j) BBB integrity as measured by fibrinogen leakage was assessed by immunofluorescence on frozen sections (cerebellum, brainstem, spinal cord) from representative EGFL7-KO mice (lower panels) or WT littermates (upper panels). (h) Representative images from the spinal cord. Scale bar = 50  $\mu$ m, EAE d10. (i, j) Semi-quantitative analysis of fibrinogen signal (green) according to (i) mean pixel intensity and (j) leakage of fibrinogen according to relative pixel intensity (mean pixel intensity X area). n  $\geq$  5 sections/group, from n = 4 mice/group, EAE d10. \* p < 0.05 (Mann-Whitney U-test). (k) EAE course and (l) proportion of asymptomatic animals over time in MOG<sub>35-55</sub>-immunized *Rag2<sup>-/-</sup>cgn<sup>-/-</sup>* mice reconstituted with CD4 T lymphocytes from EGFL7-KO mice (n = 11) versus from WT littermates (n = 13). (m) EAE course and (n) proportion of asymptomatic animals over time in MOG<sub>35-55</sub>-immunized *miR-126/miR-126<sup>\*</sup>-KO* mice (open circles) versus WT littermates (black squares); n = 6-7 mice/group. No significant difference observed following analysis by two-way ANOVA for repeated measures and Mann-Whitney U-test (k, m). No significant difference following analysis by Mantel-Cox and Gehan-Breslow-Wilcoxon tests (l, n). (o) *Egfl7<sup>fl/fl</sup>;Cdh5(PAC)-CreERT2* male mice were treated either with tamoxifen (right panel) or vehicle (left panel) on d4 and d3 prior to EAE-induction. Successful deletion of EGFL7 by tamoxifen-inducible Cre-recombination is visualized by eGFP-signal (green).

**Supplementary Table 1: EGFL7 knockout (KO) is associated with an earlier onset of EAE pathology compared to wild type (WT) littermates in two independent experiments**

| Day after immunization | Proportion of mice showing EAE clinical signs |                |          |                |
|------------------------|-----------------------------------------------|----------------|----------|----------------|
|                        | EAE 1                                         |                | EAE 2    |                |
|                        | EGFL7 KO                                      | WT littermates | EGFL7 KO | WT littermates |
| 5                      | 0/5                                           | 0/5            | 0/7      | 0/7            |
| 6                      | 0/5                                           | 0/5            | 0/7      | 0/7            |
| 7                      | 0/5                                           | 0/5            | 1/7      | 0/7            |
| 8                      | 2/5                                           | 0/5            | 2/7      | 0/7            |
| 9                      | 2/5                                           | 1/5            | 2/7      | 0/7            |
| 10                     | 5/5                                           | 1/5            | 3/7      | 0/7            |
| 11                     | 5/5                                           | 4/5            | 6/7      | 0/7            |
| 12                     | 5/5                                           | 4/5            | 6/7      | 1/7            |
